# Supplementary material for: Genetic model for the color anomalies at the termination of pegmatitic gem tourmaline crystals from the island of Elba, Italy
Source: Copernicus journal article supplement (doi:10.5194/ejm-35-755-2023), 2023-09-15

**Table S2.1.** Average chemical composition and atoms per formula unit (a.p.f.u) for the different zones of Federico sample (Catri, Sant’ Ilario in Campo, Elba Island, Italy) with the relative empirical formula.

| Prismatic section              |                    | Termination        |
|--------------------------------|--------------------|--------------------|
| Z1                             |                    | Z2                 |
| <i>n</i> = 5                   |                    | <i>n</i> = 19      |
| SiO <sub>2</sub> wt%           | 38.77(34)          | 35.99(35)          |
| TiO <sub>2</sub>               | 0.03(2)            | 0.03(2)            |
| B <sub>2</sub> O <sub>3</sub>  | 11.30 <sup>a</sup> | 10.32 <sup>a</sup> |
| Al <sub>2</sub> O <sub>3</sub> | 43.09(59)          | 34.66(59)          |
| FeO <sub>tot</sub>             | 0.01(1)            | 13.33(57)          |
| MnO                            | 0.44(32)           | 0.25(5)            |
| CaO                            | 0.03(2)            | 0.14(8)            |
| Na <sub>2</sub> O              | 1.85(9)            | 1.59(21)           |
| Li <sub>2</sub> O              | 1.88 <sup>b</sup>  | 0.21 <sup>b</sup>  |
| F                              | 0.51(17)           | 0.35(23)           |
| H <sub>2</sub> O               | 3.51 <sup>a</sup>  | 3.00 <sup>a</sup>  |
| –O ≡ F                         | –0.22              | –0.14              |
| FeO                            | 0.01 <sup>c</sup>  | 13.33 <sup>c</sup> |
| Fe <sub>2</sub> O <sub>3</sub> | -                  | -                  |
| Total                          | 101.25             | 99.81              |
| Atoms normalized to 31 anions  |                    |                    |
| Si apfu                        | 6.004              | 6.059              |
| Ti                             | 0.003              | 0.004              |
| B                              | 3.000              | 3.000              |
| Al                             | 7.780              | 6.877              |
| Fe <sup>3+</sup>               | -                  | -                  |
| Fe <sup>2+</sup>               | 0.001              | 1.877              |
| Mn <sup>2+</sup>               | 0.057              | 0.035              |
| Ca                             | 0.004              | 0.025              |
| Na                             | 0.551              | 0.519              |
| Li                             | 1.163              | 0.142              |
| F                              | 0.250              | 0.184              |
| OH                             | 3.650              | 3.371              |
| OH+F                           | 3.851              | 3.555              |
| Species                        | Elbaite            | Schorl             |

<sup>a</sup> Calculated by stoichiometry (see text)

<sup>b</sup> Estimated with the procedure of Pesquera et al. (2016)

<sup>c</sup> Determined by Mössbauer spectroscopy

Errors for oxides and fluorine are standard deviations (in brackets)

#### Empirical chemical formulae

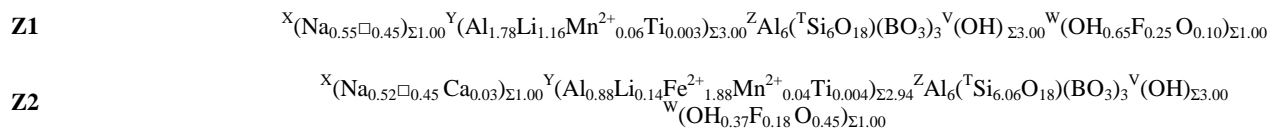

**Table S2.2.** Average chemical composition and atoms per formula unit (a.p.f.u) for the different zones of Giganti Storti sample (San Piero in Campo, Elba Island, Italy) with the relative empirical formula.

|                                          | Analogous          |                    | Prismatic section  |                    |                    | Termination        |
|------------------------------------------|--------------------|--------------------|--------------------|--------------------|--------------------|--------------------|
|                                          | Z1                 | Z2                 | Z3                 | Z4                 | Z5                 | Z6                 |
|                                          | n = 1              | n = 3              | n = 6              | n = 11             | n = 10             | n = 4              |
| SiO <sub>2</sub> wt%                     | 38.42              | 37.95(15)          | 38.58(23)          | 38.55(29)          | 38.71(26)          | 38.17(71)          |
| TiO <sub>2</sub>                         | 0.04               | 0.21(1)            | 0.06(4)            | 0.03(2)            | 0.03(2)            | 0.07(2)            |
| B <sub>2</sub> O <sub>3</sub>            | 10.98 <sup>a</sup> | 10.83 <sup>a</sup> | 11.04 <sup>a</sup> | 11.24 <sup>a</sup> | 11.22 <sup>a</sup> | 11.08 <sup>a</sup> |
| Al <sub>2</sub> O <sub>3</sub>           | 38.79              | 37.44(13)          | 39.46(61)          | 42.81(47)          | 42.25(15)          | 41.36(76)          |
| FeO <sub>tot</sub>                       | 0.27               | 0.36(7)            | 0.22(5)            | 0.03(3)            | 0.06(3)            | 0.21(5)            |
| MnO                                      | 3.73               | 4.97(14)           | 3.07(51)           | 0.51(40)           | 0.26(11)           | 1.36(40)           |
| CaO                                      | 0.15               | 0.45(14)           | 0.15(4)            | 0.17(7)            | 0.26(6)            | 0.04(3)            |
| Na <sub>2</sub> O                        | 2.36               | 2.51(4)            | 2.29(8)            | 1.83(6)            | 1.87(6)            | 2.23(7)            |
| Li <sub>2</sub> O                        | 1.77 <sup>b</sup>  | 1.66 <sup>b</sup>  | 1.83 <sup>b</sup>  | 1.87 <sup>b</sup>  | 1.99 <sup>b</sup>  | 1.83 <sup>b</sup>  |
| F                                        | 1.44               | 1.44(24)           | 0.97(11)           | 0.86(24)           | 1.06(9)            | 0.57(10)           |
| H <sub>2</sub> O                         | 3.04 <sup>a</sup>  | 2.87 <sup>a</sup>  | 3.27 <sup>a</sup>  | 3.30 <sup>a</sup>  | 3.23 <sup>a</sup>  | 3.37 <sup>a</sup>  |
| Total                                    | 100.50             | 100.16             | 100.62             | 100.95             | 100.61             | 100.11             |
| Atomic fractions normalized to 31 anions |                    |                    |                    |                    |                    |                    |
| Si apfu                                  | 6.083              | 6.091              | 6.072              | 5.958              | 5.996              | 5.986              |
| Ti                                       | 0.004              | 0.026              | 0.008              | 0.004              | 0.004              | 0.008              |
| B                                        | 3.000              | 3.000              | 3.000              | 3.000              | 3.000              | 3.000              |
| Al                                       | 7.238              | 7.083              | 7.320              | 7.800              | 7.713              | 7.644              |
| Fe <sup>2+</sup>                         | 0.035              | 0.049              | 0.028              | 0.004              | 0.007              | 0.027              |
| Mn <sup>2+</sup>                         | 0.501              | 0.675              | 0.410              | 0.067              | 0.035              | 0.180              |
| Ca                                       | 0.026              | 0.077              | 0.025              | 0.029              | 0.043              | 0.008              |
| Na                                       | 0.724              | 0.781              | 0.697              | 0.549              | 0.561              | 0.678              |
| Li                                       | 1.127              | 1.072              | 1.158              | 1.163              | 1.240              | 1.154              |
| F                                        | 0.719              | 0.731              | 0.484              | 0.419              | 0.521              | 0.282              |
| OH                                       | 3.213              | 3.078              | 3.438              | 3.400              | 3.341              | 3.530              |
| OH+F                                     | 3.932              | 3.808              | 3.922              | 3.819              | 3.862              | 3.812              |
| Species                                  | Fluor-elbaite      | Fluor-elbaite      | Fluor-elbaite      | Fluor-elbaite      | Fluor-elbaite      | Elbaite            |

<sup>a</sup> Calculated by stoichiometry (see text)

<sup>b</sup> Estimated with the procedure of Pesquera et al. (2016)

Errors for oxides and fluorine are standard deviations (in brackets)

#### Empirical chemical formulae

|           |                                                                                                                                                                                                                                                                                                                                                                                                               |
|-----------|---------------------------------------------------------------------------------------------------------------------------------------------------------------------------------------------------------------------------------------------------------------------------------------------------------------------------------------------------------------------------------------------------------------|
| <b>Z1</b> | $\begin{matrix} \text{X}(\text{Na}_{0.72\pm0.25}\text{Ca}_{0.03})\Sigma_{1.00} \text{Y}(\text{Al}_{1.24}\text{Li}_{1.13}\text{Fe}^{2+}_{0.04}\text{Mn}^{2+}_{0.50}\text{Ti}_{0.004})\Sigma_{2.92} \text{ZAl}_6(\text{T}\text{Si}_{6.08}\text{O}_{18})(\text{BO}_3)_3 \text{V}(\text{OH})\Sigma_{3.00} \\ \text{W}(\text{OH}_{0.21}\text{F}_{0.72}\text{O}_{0.07})\Sigma_{1.00} \end{matrix}$                  |
| <b>Z2</b> | $\begin{matrix} \text{X}(\text{Na}_{0.78\pm0.14}\text{Ca}_{0.08})\Sigma_{1.00} \text{Y}(\text{Al}_{1.08}\text{Li}_{1.07}\text{Fe}^{2+}_{0.05}\text{Mn}^{2+}_{0.68}\text{Ti}_{0.03})\Sigma_{2.91} \text{ZAl}_6(\text{T}\text{Si}_{6.09}\text{O}_{18})(\text{BO}_3)_3 \text{V}(\text{OH})\Sigma_{3.00} \\ \text{W}(\text{OH}_{0.08}\text{F}_{0.73}\text{O}_{0.19})\Sigma_{1.00} \end{matrix}$                   |
| <b>Z3</b> | $\begin{matrix} \text{X}(\text{Na}_{0.70\pm0.27}\text{Ca}_{0.03})\Sigma_{1.00} \text{Y}(\text{Al}_{1.32}\text{Li}_{1.16}\text{Fe}^{2+}_{0.03}\text{Mn}^{2+}_{0.41}\text{Ti}_{0.01})\Sigma_{2.93} \text{ZAl}_6(\text{T}\text{Si}_{6.07}\text{O}_{18})(\text{BO}_3)_3 \text{V}(\text{OH})\Sigma_{3.00} \\ \text{W}(\text{OH}_{0.44}\text{F}_{0.48}\text{O}_{0.08})\Sigma_{1.00} \end{matrix}$                   |
| <b>Z4</b> | $\begin{matrix} \text{X}(\text{Na}_{0.55\pm0.42}\text{Ca}_{0.03})\Sigma_{1.00} \text{Y}(\text{Al}_{1.76}\text{Li}_{1.16}\text{Mn}^{2+}_{0.07}\text{Ti}_{0.004})\Sigma_{3.00} \text{ZAl}_6[\text{T}(\text{Si}_{5.96}\text{Al}_{0.04})\text{O}_{18}](\text{BO}_3)_3 \text{V}(\text{OH})\Sigma_{3.00} \\ \text{W}(\text{OH}_{0.40}\text{F}_{0.42}\text{O}_{0.18})\Sigma_{1.00} \end{matrix}$                     |
| <b>Z5</b> | $\begin{matrix} \text{X}(\text{Na}_{0.56\pm0.40}\text{Ca}_{0.04})\Sigma_{1.00} \text{Y}(\text{Al}_{1.71}\text{Li}_{1.24}\text{Fe}^{2+}_{0.01}\text{Mn}^{2+}_{0.04}\text{Ti}_{0.004})\Sigma_{3.00} \text{ZAl}_6(\text{T}\text{Si}_{6.00}\text{O}_{18})(\text{BO}_3)_3 \text{V}(\text{OH})\Sigma_{3.00} \\ \text{W}(\text{OH}_{0.34}\text{F}_{0.52}\text{O}_{0.14})\Sigma_{1.00} \end{matrix}$                  |
| <b>Z6</b> | $\begin{matrix} \text{X}(\text{Na}_{0.56\pm0.40}\text{Ca}_{0.04})\Sigma_{1.00} \text{Y}(\text{Al}_{1.63}\text{Li}_{1.15}\text{Fe}^{2+}_{0.03}\text{Mn}^{2+}_{0.18}\text{Ti}_{0.01})\Sigma_{3.00} \text{ZAl}_6[\text{T}(\text{Si}_{5.99}\text{Al}_{0.01})\text{O}_{18}](\text{BO}_3)_3 \text{V}(\text{OH})\Sigma_{3.00} \\ \text{W}(\text{OH}_{0.53}\text{F}_{0.28}\text{O}_{0.05})\Sigma_{1.00} \end{matrix}$ |

**Table S2.3.** Average chemical composition and atoms per formula unit (a.p.f.u) for the different zones of Pastori sample (Catri, Sant’Ilario in Campo, Elba Island, Italy)

|                                          | Prismatic section   |                    |                    |                    |                    |                    |                    |                    |                    | Termination         |                      |
|------------------------------------------|---------------------|--------------------|--------------------|--------------------|--------------------|--------------------|--------------------|--------------------|--------------------|---------------------|----------------------|
|                                          | Z1<br><i>n</i> = 21 | Z2<br><i>n</i> = 1 | Z3<br><i>n</i> = 1 | Z4<br><i>n</i> = 1 | Z5<br><i>n</i> = 2 | Z6<br><i>n</i> = 2 | Z7<br><i>n</i> = 1 | Z8<br><i>n</i> = 1 | Z9<br><i>n</i> = 3 | Z10<br><i>n</i> = 3 | Z11<br><i>n</i> = 16 |
| SiO <sub>2</sub> wt%                     | 37.63(30)           | 37.45              | 37.13              | 35.92              | 37.68(29)          | 36.48(1)           | 37.37              | 37.49              | 38.20(15)          | 36.04(72)           | 36.85(32)            |
| TiO <sub>2</sub>                         | 0.30(4)             | 0.22               | 0.26               | 0.35               | 0.26(1)            | 0.30(1)            | 0.26               | 0.25               | 0.25(2)            | 0.40(5)             | 0.29(13)             |
| B <sub>2</sub> O <sub>3</sub>            | 10.83 <sup>a</sup>  | 10.67 <sup>a</sup> | 10.57 <sup>a</sup> | 10.27 <sup>a</sup> | 10.71 <sup>a</sup> | 10.43 <sup>a</sup> | 10.69 <sup>a</sup> | 10.69 <sup>a</sup> | 10.89 <sup>a</sup> | 10.25 <sup>a</sup>  | 10.55 <sup>a</sup>   |
| Al <sub>2</sub> O <sub>3</sub>           | 38.65(95)           | 36.78              | 35.87              | 33.87              | 36.55(32)          | 35.10(1)           | 37.23              | 36.30              | 38.10(52)          | 33.44(78)           | 33.30(66)            |
| FeO <sub>tot</sub>                       | 1.59(88)            | 4.24               | 5.91               | 11.59              | 4.37(97)           | 8.29(18)           | 3.28               | 6.26               | 2.64(80)           | 11.50(87)           | 10.41(88)            |
| MnO                                      | 2.07(37)            | 1.40               | 1.61               | 0.96               | 1.83(44)           | 1.09(12)           | 1.80               | 1.23               | 1.46(20)           | 0.65(5)             | 0.06(3)              |
| ZnO                                      | 0.04(4)             | -                  | 0.06               | 0.12               | 0.10               | 0.19(11)           | 0.06               | 0.13               | 0.05(4)            | 0.06(2)             | 0.03(3)              |
| MgO                                      | -                   | 0.03               | -                  | -                  | -                  | -                  | -                  | 0.11               | 0.01(1)            | -                   | 3.13(68)             |
| CaO                                      | 0.51(7)             | 0.24               | 0.13               | 0.04               | 0.17(2)            | 0.09(3)            | 0.18               | 0.17               | 0.21(6)            | 0.07(3)             | 0.09(12)             |
| Na <sub>2</sub> O                        | 2.01(10)            | 2.30               | 2.26               | 1.65               | 2.23(7)            | 2.04(1)            | 2.22               | 2.17               | 2.08(10)           | 1.64(15)            | 1.49(16)             |
| Li <sub>2</sub> O                        | 1.73 <sup>b</sup>   | 1.57 <sup>b</sup>  | 1.31 <sup>b</sup>  | 0.49 <sup>b</sup>  | 1.53 <sup>b</sup>  | 0.98 <sup>b</sup>  | 1.61 <sup>b</sup>  | 1.30 <sup>b</sup>  | 1.78 <sup>b</sup>  | 0.63 <sup>b</sup>   | 0.33 <sup>b</sup>    |
| F                                        | 1.17(20)            | 1.59               | 1.24               | 1.05               | 1.38(10)           | 1.03(18)           | 1.17               | 1.01               | 0.83(7)            | 0.51(10)            | 0.29(12)             |
| H <sub>2</sub> O                         | 3.04                | 2.83               | 2.94               | 2.85               | 2.99               | 2.96               | 3.07 <sup>a</sup>  | 3.11 <sup>a</sup>  | 3.36 <sup>a</sup>  | 3.12 <sup>a</sup>   | 3.50 <sup>a</sup>    |
| -O ≡ F                                   | -0.49               | -0.67              | -0.52              | -0.44              | -0.58              | -0.43              | -0.49              | -0.43              | -0.35              | -0.21               | -0.12                |
| FeO                                      | 1.59                | 4.24               | 5.91               | 11.59              | 4.37               | 8.29               | 3.28               | 6.26               | 2.64               | 11.09 <sup>c</sup>  | 10.41                |
| Fe <sub>2</sub> O <sub>3</sub>           | -                   | -                  | -                  | -                  | -                  | -                  | -                  | -                  | -                  | 0.41 <sup>c</sup>   | -                    |
| Total                                    | 99.15               | 98.66              | 98.76              | 98.72              | 99.23              | 98.55              | 98.45              | 99.80              | 99.52              | 98.10               | 100.33               |
| Atomic fractions normalized to 31 anions |                     |                    |                    |                    |                    |                    |                    |                    |                    |                     |                      |
| Si apfu                                  | 6.038               | 6.102              | 6.115              | 6.097              | 6.116              | 6.080              | 6.078              | 6.098              | 6.099              | 6.112               | 6.068                |
| Ti                                       | 0.036               | 0.027              | 0.032              | 0.044              | 0.031              | 0.037              | 0.031              | 0.030              | 0.030              | 0.051               | 0.036                |
| B                                        | 3.000               | 3.000              | 3.000              | 3.000              | 3.000              | 3.000              | 2.990              | 3.000              | 3.000              | 3.000               | 3.000                |
| Al                                       | 7.309               | 7.064              | 6.952              | 6.753              | 6.993              | 6.894              | 7.131              | 6.958              | 7.170              | 6.682               | 6.463                |
| Fe <sup>3+</sup>                         | -                   | -                  | -                  | -                  | -                  | -                  | -                  | -                  | -                  | 0.052               | -                    |
| Fe <sup>2+</sup>                         | 0.213               | 0.578              | 0.813              | 1.640              | 0.593              | 1.155              | 0.446              | 0.852              | 0.353              | 1.572               | 1.434                |
| Mn <sup>2+</sup>                         | 0.282               | 0.193              | 0.224              | 0.138              | 0.251              | 0.154              | 0.248              | 0.169              | 0.198              | 0.093               | 0.008                |
| Zn                                       | 0.004               | -                  | 0.007              | 0.015              | 0.012              | 0.023              | 0.007              | 0.016              | 0.006              | 0.008               | 0.000                |
| Mg                                       | -                   | 0.007              | -                  | -                  | -                  | -                  | -                  | 0.027              | 0.002              | -                   | 0.768                |
| Ca                                       | 0.087               | 0.042              | 0.023              | 0.007              | 0.030              | 0.016              | 0.031              | 0.029              | 0.036              | 0.012               | 0.016                |
| Na                                       | 0.627               | 0.727              | 0.721              | 0.541              | 0.701              | 0.659              | 0.700              | 0.685              | 0.643              | 0.539               | 0.475                |
| Li                                       | 1.116               | 1.029              | 0.867              | 0.333              | 0.999              | 0.657              | 1.053              | 0.850              | 1.143              | 0.429               | 0.219                |
| F                                        | 0.594               | 0.817              | 0.645              | 0.562              | 0.710              | 0.543              | 0.602              | 0.522              | 0.420              | 0.274               | 0.150                |
| OH                                       | 3.250               | 3.076              | 3.229              | 3.220              | 3.238              | 3.295              | 3.334              | 3.369              | 3.578              | 3.529               | 3.844                |
| OH+F                                     | 3.844               | 3.893              | 3.874              | 3.782              | 3.948              | 3.838              | 3.936              | 3.891              | 3.998              | 3.803               | 3.994                |
| Species                                  | Fluor-elbaite       | Fluor-elbaite      | Fluor-elbaite      | Fluor-schorl       | Fluor-elbaite      | Fluor-elbaite      | Fluor-elbaite      | Fluor-elbaite      | Elbaite            | Schorl              | Foitite              |

<sup>a</sup> Calculated by stoichiometry (see text);

<sup>b</sup> Estimated with the procedure of Pesquera et al. (2016);

<sup>c</sup> Determined by Mössbauer spectroscopy

Errors for oxides and fluorine are standard deviations (in brackets)

#### Empirical chemical formulae

|            |                                                                                                                                                                                                                           |
|------------|---------------------------------------------------------------------------------------------------------------------------------------------------------------------------------------------------------------------------|
| <b>Z1</b>  | $X_{(Na_{0.63}Ca_{0.09})\Sigma 1.00} Y_{(Al_{1.31}Li_{1.12}Fe^{2+}_{0.21}Mn^{2+}_{0.28}Ti_{0.04})\Sigma 2.96} Z_{Al_6(TSi_{6.04}O_{18})(BO_3)_3(OH)\Sigma 3.00} W_{(OH_{0.25}F_{0.59}O_{0.16})\Sigma 1.00}$               |
| <b>Z2</b>  | $X_{(Na_{0.73}Ca_{0.04})\Sigma 1.00} Y_{(Al_{1.06}Li_{1.03}Fe^{2+}_{0.58}Mg_{0.01}Mn^{2+}_{0.19}Ti_{0.03})\Sigma 2.90} Z_{Al_6(TSi_{6.10}O_{18})(BO_3)_3(OH)\Sigma 3.00} W_{(OH_{0.08}F_{0.82}O_{0.10})\Sigma 1.00}$      |
| <b>Z3</b>  | $X_{(Na_{0.72}Ca_{0.02})\Sigma 1.00} Y_{(Al_{0.95}Li_{0.87}Fe^{2+}_{0.81}Mn^{2+}_{0.22}Ti_{0.03})\Sigma 2.88} Z_{Al_6(TSi_{6.12}O_{18})(BO_3)_3(OH)\Sigma 3.00} W_{(OH_{0.23}F_{0.65}O_{0.12})\Sigma 1.00}$               |
| <b>Z4</b>  | $X_{(Na_{0.54}Ca_{0.01})\Sigma 1.00} Y_{(Al_{0.75}Li_{0.33}Fe^{2+}_{1.64}Mn^{2+}_{0.14}Ti_{0.04})\Sigma 2.90} Z_{Al_6(TSi_{6.10}O_{18})(BO_3)_3(OH)\Sigma 3.00} W_{(OH_{0.20}F_{0.56}O_{0.24})\Sigma 1.00}$               |
| <b>Z5</b>  | $X_{(Na_{0.70}Ca_{0.03})\Sigma 1.00} Y_{(Al_{0.99}Li_{1.00}Fe^{2+}_{0.59}Mn^{2+}_{0.25}Ti_{0.03})\Sigma 2.88} Z_{Al_6(TSi_{6.12}O_{18})(BO_3)_3(OH)\Sigma 3.00} W_{(OH_{0.24}F_{0.71}O_{0.05})\Sigma 1.00}$               |
| <b>Z6</b>  | $X_{(Na_{0.66}Ca_{0.02})\Sigma 1.00} Y_{(Al_{0.89}Li_{0.66}Fe^{2+}_{1.15}Mn^{2+}_{0.15}Ti_{0.03})\Sigma 2.92} Z_{Al_6(TSi_{6.08}O_{18})(BO_3)_3(OH)\Sigma 3.00} W_{(OH_{0.30}F_{0.54}O_{0.16})\Sigma 1.00}$               |
| <b>Z7</b>  | $X_{(Na_{0.70}Ca_{0.03})\Sigma 1.00} Y_{(Al_{1.31}Li_{1.05}Fe^{2+}_{0.45}Mn^{2+}_{0.25}Ti_{0.03})\Sigma 2.92} Z_{Al_6(TSi_{6.08}O_{18})(BO_3)_3(OH)\Sigma 3.00} W_{(OH_{0.33}F_{0.60}O_{0.07})\Sigma 1.00}$               |
| <b>Z8</b>  | $X_{(Na_{0.69}Ca_{0.03})\Sigma 1.00} Y_{(Al_{0.96}Li_{0.85}Fe^{2+}_{0.85}Mn^{2+}_{0.17}Ti_{0.03})\Sigma 2.90} Z_{Al_6(TSi_{6.10}O_{18})(BO_3)_3(OH)\Sigma 3.00} W_{(OH_{0.37}F_{0.52}O_{0.11})\Sigma 1.00}$               |
| <b>Z9</b>  | $X_{(Na_{0.64}Ca_{0.04})\Sigma 1.00} Y_{(Al_{1.17}Li_{1.14}Fe^{2+}_{0.35}Mn^{2+}_{0.20}Ti_{0.03})\Sigma 2.90} Z_{Al_6(TSi_{6.10}O_{18})(BO_3)_3(OH)\Sigma 3.00} W_{(OH_{0.58}F_{0.42})\Sigma 1.00}$                       |
| <b>Z10</b> | $X_{(Na_{0.54}Ca_{0.01})\Sigma 1.00} Y_{(Al_{0.68}Li_{0.43}Fe^{2+}_{1.57}Fe^{3+}_{0.05}Mn^{2+}_{0.09}Ti_{0.05})\Sigma 2.89} Z_{Al_6(TSi_{6.11}O_{18})(BO_3)_3(OH)\Sigma 3.00} W_{(OH_{0.53}F_{0.27}O_{0.20})\Sigma 1.00}$ |
| <b>Z11</b> | $X_{(Na_{0.48}Ca_{0.02})\Sigma 1.00} Y_{(Al_{0.46}Li_{0.22}Fe^{2+}_{1.43}Mn^{2+}_{0.01}Mg_{0.77}Ti_{0.04})\Sigma 2.93} Z_{Al_6(TSi_{6.07}O_{18})(BO_3)_3(OH)\Sigma 3.00} W_{(OH_{0.84}F_{0.15}O_{0.01})\Sigma 1.00}$      |

**Table S2.4.** Average chemical composition and atoms per formula unit (a.p.f.u) for the different zones of Rosina 2 sample (San Piero in Campo, Elba Island, Italy) with the relative empirical formula.

| Prismatic section              |                    |                    | Termination        |                    |                    |                    |                    |                    |
|--------------------------------|--------------------|--------------------|--------------------|--------------------|--------------------|--------------------|--------------------|--------------------|
| Z1                             | Z2                 |                    | Z3                 | Z4                 | Z5                 | Z6                 | Z7                 | Z8                 |
| <i>n</i> = 17                  | <i>n</i> = 1       |                    | <i>n</i> = 5       | <i>n</i> = 1       | <i>n</i> = 1       | <i>n</i> = 1       | <i>n</i> = 1       | <i>n</i> = 2       |
| SiO <sub>2</sub> wt%           | 37.65(32)          | 36.91              | 36.43(30)          | 37.77              | 36.98              | 37.62              | 37.09              | 37.48(4)           |
| TiO <sub>2</sub>               | 0.12(3)            | 0.24               | 0.13(3)            | 0.09               | 0.05               | 0.06               | 0.09               | 0.05(1)            |
| B <sub>2</sub> O <sub>3</sub>  | 11.04 <sup>a</sup> | 10.76 <sup>a</sup> | 10.61 <sup>a</sup> | 10.95 <sup>a</sup> | 10.74 <sup>a</sup> | 10.89 <sup>a</sup> | 10.68 <sup>a</sup> | 10.83 <sup>a</sup> |
| Al <sub>2</sub> O <sub>3</sub> | 41.30(35)          | 38.46              | 35.96(40)          | 38.46              | 38.47              | 39.03              | 35.78              | 37.02(49)          |
| FeO <sub>tot</sub>             | 0.09(10)           | 1.50               | 1.83(81)           | 0.59               | 0.41               | 0.63               | 2.36               | 1.39(8)            |
| MnO                            | 3.54(22)           | 5.48               | 11.55(40)          | 8.49               | 5.51               | 4.87               | 9.85               | 9.69(35)           |
| MgO                            | -                  | 0.02               | 0.02(1)            | 0.01               | -                  | 0.05               | 0.03               | 0.05(1)            |
| CaO                            | 0.06(3)            | 0.07               | 0.01(1)            | 0.03               | 0.01               | 0.02               | -                  | -                  |
| Na <sub>2</sub> O              | 1.87(7)            | 2.25               | 1.33(3)            | 1.56               | 1.48               | 1.49               | 1.33               | 1.19(13)           |
| K <sub>2</sub> O               | 0.01(1)            | 0.00               | 0.01(1)            | 0.03               | 0.00               | 0.04               | 0.01               | 0.02(2)            |
| Li <sub>2</sub> O <sup>b</sup> | 1.44 <sup>b</sup>  | 1.12 <sup>b</sup>  | 0.33 <sup>b</sup>  | 0.91 <sup>b</sup>  | 1.32 <sup>b</sup>  | 1.40 <sup>b</sup>  | 0.61 <sup>b</sup>  | 0.71 <sup>b</sup>  |
| F                              | 0.63(16)           | 1.07               | 0.32(10)           | 0.32               | 0.18               | 0.12               | 0.18               | 0.10(14)           |
| H <sub>2</sub> O               | 3.28 <sup>a</sup>  | 2.92 <sup>a</sup>  | 3.39 <sup>a</sup>  | 3.51 <sup>a</sup>  | 3.68 <sup>a</sup>  | 3.75 <sup>a</sup>  | 3.59 <sup>a</sup>  | 3.71 <sup>a</sup>  |
| -O ≡ F                         | -0.27              | -0.45              | -0.13              | -0.13              | -0.07              | -0.05              | -0.08              | -0.04              |
| FeO                            | 0.09               | -                  | 1.83               | 0.59               | 0.41               | 0.63               | 2.27 <sup>c</sup>  | 1.39               |
| Fe <sub>2</sub> O <sub>3</sub> | -                  | -                  | -                  | -                  | -                  | -                  | 0.09 <sup>c</sup>  | -                  |
| Total                          | 100.80             | 100.35             | 101.82             | 102.60             | 98.77              | 99.97              | 101.56             | 102.23             |

**Atoms normalized to 31 anions**

|                  |       |       |       |       |       |       |       |       |
|------------------|-------|-------|-------|-------|-------|-------|-------|-------|
| Si apfu          | 5.927 | 5.963 | 5.976 | 5.994 | 5.986 | 6.001 | 6.038 | 6.016 |
| Ti               | 0.014 | 0.029 | 0.016 | 0.011 | 0.006 | 0.007 | 0.011 | 0.006 |
| B                | 3.000 | 3.000 | 3.000 | 3.000 | 3.000 | 3.000 | 3.000 | 3.000 |
| Al               | 7.663 | 7.322 | 6.942 | 7.193 | 7.338 | 7.339 | 6.864 | 7.003 |
| Fe <sup>3+</sup> | -     | -     | -     | -     | -     | -     | 0.012 | -     |
| Fe <sup>2+</sup> | 0.012 | 0.203 | 0.251 | 0.078 | 0.055 | 0.084 | 0.309 | 0.187 |
| Mn <sup>2+</sup> | 0.472 | 0.750 | 1.602 | 1.141 | 0.755 | 0.658 | 1.358 | 1.317 |
| Mg               | 0.000 | 0.000 | 0.005 | 0.002 | 0.000 | 0.012 | 0.007 | 0.012 |
| Ca               | 0.010 | 0.012 | 0.002 | 0.005 | 0.002 | 0.007 | 0.000 | 0.001 |
| Na               | 0.572 | 0.704 | 0.422 | 0.480 | 0.407 | 0.459 | 0.419 | 0.369 |
| K                | 0.002 | 0.000 | 0.002 | 0.005 | 0.000 | 0.008 | 0.001 | 0.003 |
| Li               | 0.912 | 0.728 | 0.217 | 0.581 | 0.859 | 0.898 | 0.399 | 0.458 |
| F                | 0.316 | 0.545 | 0.167 | 0.161 | 0.092 | 0.062 | 0.093 | 0.058 |
| OH               | 3.449 | 3.144 | 3.704 | 3.714 | 3.975 | 3.985 | 3.900 | 3.975 |
| OH+F             | 3.765 | 3.689 | 3.871 | 3.875 | 4.067 | 4.048 | 3.992 | 4.026 |

**Species**      **Elbaite**      **Fluor-elbaite**      **Celleriite**      **Celleriite**      **Rossmannite**      **Rossmannite**      **Celleriite**      **Celleriite**

<sup>a</sup> Calculated by stoichiometry (see text);

<sup>b</sup> Estimated with the procedure of Pesquera et al. (2016);

<sup>c</sup> Determined by Mössbauer spectroscopy

Errors for oxides and fluorine are standard deviations (in brackets)

**Empirical chemical formulae**

|           |                                                                                                                                                                                                                                                           |
|-----------|-----------------------------------------------------------------------------------------------------------------------------------------------------------------------------------------------------------------------------------------------------------|
| <b>Z1</b> | $X_{(Na_{0.57} \square_{0.42} Ca_{0.01}) \Sigma 1.00} Y_{(Al_{1.59} Li_{0.91} Fe^{2+}_{0.01} Mn^{2+}_{0.47} Ti_{0.01}) \Sigma 3.00} Z_{Al_6 [T(Si_{5.93} Al_{0.07}) O_{18}] (BO_3)_3} V_{(OH) \Sigma 3.00} W_{(OH_{0.45} F_{0.32} O_{0.23}) \Sigma 1.00}$ |
| <b>Z2</b> | $X_{(Na_{0.70} \square_{0.29} Ca_{0.01}) \Sigma 1.00} Y_{(Al_{1.28} Li_{0.73} Fe^{2+}_{0.20} Mn^{2+}_{0.75} Ti_{0.03}) \Sigma 3.00} Z_{Al_6 [T(Si_{5.96} Al_{0.04}) O_{18}] (BO_3)_3} V_{(OH) \Sigma 3.00} W_{(OH_{0.14} F_{0.54} O_{0.32}) \Sigma 1.00}$ |
| <b>Z3</b> | $X_{(Na_{0.42} \square_{0.58}) \Sigma 1.00} Y_{(Al_{0.92} Li_{0.22} Fe^{2+}_{0.25} Mn^{2+}_{1.60} Ti_{0.02}) \Sigma 3.00} Z_{Al_6 [T(Si_{5.98} Al_{0.02}) O_{18}] (BO_3)_3} V_{(OH) \Sigma 3.00} W_{(OH_{0.70} F_{0.17} O_{0.13}) \Sigma 1.00}$           |
| <b>Z4</b> | $X_{(Na_{0.48} \square_{0.51} Ca_{0.01}) \Sigma 1.00} Y_{(Al_{1.18} Li_{0.58} Fe^{2+}_{0.08} Mn^{2+}_{1.14} Ti_{0.01}) \Sigma 3.00} Z_{Al_6 [T(Si_{5.99} Al_{0.01}) O_{18}] (BO_3)_3} V_{(OH) \Sigma 3.00} W_{(OH_{0.71} F_{0.16} O_{0.13}) \Sigma 1.00}$ |
| <b>Z5</b> | $X_{(Na_{0.41} \square_{0.59}) \Sigma 1.00} Y_{(Al_{1.33} Li_{0.86} Fe^{2+}_{0.06} Mn^{2+}_{0.76} Ti_{0.01}) \Sigma 3.00} Z_{Al_6 [T(Si_{5.99} Al_{0.01}) O_{18}] (BO_3)_3} V_{(OH) \Sigma 3.00} W_{(OH_{0.97} F_{0.03}) \Sigma 1.00}$                    |
| <b>Z6</b> | $X_{(Na_{0.46} \square_{0.53} Ca_{0.01}) \Sigma 1.00} Y_{(Al_{1.34} Li_{0.90} Fe^{2+}_{0.08} Mn^{2+}_{0.66} Ti_{0.01}) \Sigma 3.00} Z_{Al_6 [T(Si_{6.00} O_{18}) (BO_3)_3} V_{(OH) \Sigma 3.00} W_{(OH_{0.98} F_{0.02}) \Sigma 1.00}$                     |
| <b>Z7</b> | $X_{(Na_{0.42} \square_{0.58}) \Sigma 1.00} Y_{(Al_{0.86} Li_{0.40} Fe^{2+}_{0.31} Mn^{2+}_{1.36} Ti_{0.01}) \Sigma 2.96} Z_{Al_6 (T(Si_{6.04} O_{18}) (BO_3)_3} V_{(OH) \Sigma 3.00} W_{(OH_{0.90} F_{0.09} O_{0.01}) \Sigma 1.00}$                      |
| <b>Z8</b> | $X_{(Na_{0.37} \square_{0.63}) \Sigma 1.00} Y_{(Al_{1.00} Li_{0.46} Fe^{2+}_{0.19} Mn^{2+}_{1.32} Ti_{0.01}) \Sigma 2.98} Z_{Al_6 (T(Si_{6.02} O_{18}) (BO_3)_3} V_{(OH) \Sigma 3.00} W_{(OH_{0.98} F_{0.02}) \Sigma 1.00}$                               |

**Table S2.5.** Average chemical composition and atoms per formula unit (a.p.f.u) for the different zones of San Silvestro sample (San Piero in Campo, Elba Island, Italy) with the relative empirical formula.

|                                | Prismatic section  |                    |                    |                    | Termination        |                    |                    |                    |                    |
|--------------------------------|--------------------|--------------------|--------------------|--------------------|--------------------|--------------------|--------------------|--------------------|--------------------|
|                                | Z1                 | Z2                 | Z3                 | Z4                 | Z5                 | Z6                 | Z7                 | Z8                 | Z9                 |
|                                | <i>n</i> = 6       | <i>n</i> = 23      | <i>n</i> = 3       | <i>n</i> = 1       | <i>n</i> = 2       |
| SiO <sub>2</sub> wt%           | 37.88(31)          | 37.22(48)          | 38.11(9)           | 37.54              | 36.48              | 36.83              | 37.58              | 37.08              | 36.46(22)          |
| TiO <sub>2</sub>               | 0.05(3)            | 0.14(6)            | 0.05(2)            | 0.07               | 0.07               | 0.09               | 0.04               | 0.09               | 0.11(2)            |
| B <sub>2</sub> O <sub>3</sub>  | 11.06 <sup>a</sup> | 10.86 <sup>a</sup> | 11.09 <sup>a</sup> | 10.88 <sup>a</sup> | 10.57 <sup>a</sup> | 10.63 <sup>a</sup> | 10.69 <sup>a</sup> | 10.79 <sup>a</sup> | 10.63 <sup>a</sup> |
| Al <sub>2</sub> O <sub>3</sub> | 41.45(90)          | 39.96(98)          | 41.59(17)          | 39.23              | 35.76              | 35.96              | 35.20              | 37.84              | 35.92(33)          |
| FeO <sub>tot</sub>             | 0.17(19)           | 0.85(38)           | 0.24(13)           | 1.08               | 4.04               | 5.27               | 7.08               | 2.98               | 4.94(98)           |
| MnO                            | 2.44(51)           | 2.93(86)           | 1.30(64)           | 4.43               | 8.91               | 6.69               | 5.44               | 6.30               | 7.25(70)           |
| MgO                            | 0.01(1)            | 0.01               | 0.01(1)            | -                  | 0.06               | 0.11               | 0.11               | 0.18               | 0.44(18)           |
| CaO                            | 0.06(2)            | 0.13(8)            | 0.04(2)            | 0.06               | 0.02               | 0.03               | 0.02               | 0.12               | 0.04(2)            |
| Na <sub>2</sub> O              | 1.89(9)            | 1.99(24)           | 1.98(8)            | 1.89               | 1.03               | 1.30               | 1.06               | 1.47               | 1.23(8)            |
| K <sub>2</sub> O               | 0.02(2)            | 0.03(2)            | 0.01               | 0.01               | 0.00               | 0.03               | 0.02               | 0.02               | 0.03               |
| Li <sub>2</sub> O              | 1.61 <sup>b</sup>  | 1.51 <sup>b</sup>  | 1.80 <sup>b</sup>  | 1.35 <sup>b</sup>  | 0.39 <sup>b</sup>  | 0.55 <sup>b</sup>  | 0.61 <sup>b</sup>  | 0.82 <sup>b</sup>  | 0.48 <sup>b</sup>  |
| F                              | 0.73(15)           | 0.62(22)           | 0.22(15)           | 0.29               | 0.03               | 0.00               | 0.20               | 0.23               | 0.10(3)            |
| H <sub>2</sub> O               | 3.29 <sup>a</sup>  | 3.27 <sup>a</sup>  | 3.60 <sup>a</sup>  | 3.47 <sup>a</sup>  | 3.62 <sup>a</sup>  | 3.61 <sup>a</sup>  | 3.62 <sup>a</sup>  | 3.50 <sup>a</sup>  | 3.64 <sup>a</sup>  |
| -O ≡ F                         | -0.31              | -0.26              | -0.09              | -0.12              | -0.01              | -                  | -0.08              | -0.10              | -0.04              |
| FeO                            | 0.17               | 0.85               | 0.24               | 1.08               | 4.04               | 5.27               | 6.72 <sup>c</sup>  | 2.98               | 4.94               |
| Fe <sub>2</sub> O <sub>3</sub> | -                  | -                  | -                  | -                  | -                  | -                  | 0.35 <sup>c</sup>  | -                  | -                  |
| Total                          | 100.40             | 99.28              | 99.97              | 100.23             | 100.99             | 101.08             | 101.57             | 101.33             | 101.26             |

**Atoms normalized to 31 anions**

|                  |       |       |       |       |       |       |       |       |       |
|------------------|-------|-------|-------|-------|-------|-------|-------|-------|-------|
| Si apfu          | 5.952 | 5.958 | 5.972 | 5.996 | 5.996 | 6.023 | 6.113 | 5.972 | 5.962 |
| Ti               | 0.006 | 0.017 | 0.006 | 0.008 | 0.009 | 0.011 | 0.005 | 0.011 | 0.013 |
| B                | 3.000 | 3.000 | 3.000 | 3.000 | 3.000 | 3.000 | 3.000 | 3.000 | 3.000 |
| Al               | 7.674 | 7.538 | 7.681 | 7.385 | 6.927 | 6.932 | 6.749 | 7.182 | 6.922 |
| Fe <sup>3+</sup> | -     | -     | -     | -     | -     | -     | 0.043 | -     | -     |
| Fe <sup>2+</sup> | 0.023 | 0.114 | 0.031 | 0.145 | 0.555 | 0.720 | 0.915 | 0.401 | 0.676 |
| Mn <sup>2+</sup> | 0.325 | 0.398 | 0.173 | 0.599 | 1.241 | 0.927 | 0.749 | 0.860 | 1.003 |
| Mg               | 0.001 | 0.001 | 0.001 | -     | 0.015 | 0.027 | 0.027 | 0.043 | 0.107 |
| Ca               | 0.009 | 0.022 | 0.007 | 0.011 | 0.004 | 0.005 | 0.003 | 0.021 | 0.007 |
| Na               | 0.575 | 0.619 | 0.602 | 0.585 | 0.329 | 0.362 | 0.335 | 0.458 | 0.391 |
| K                | 0.005 | 0.005 | 0.002 | 0.001 | 0.000 | 0.006 | 0.003 | 0.005 | 0.005 |
| Li               | 1.017 | 0.972 | 1.135 | 0.867 | 0.258 | 0.362 | 0.399 | 0.531 | 0.316 |
| F                | 0.362 | 0.313 | 0.109 | 0.147 | 0.016 | 0.000 | 0.102 | 0.119 | 0.050 |
| OH               | 3.452 | 3.496 | 3.764 | 3.699 | 3.965 | 3.938 | 3.952 | 3.760 | 3.974 |
| OH+F             | 3.814 | 3.809 | 3.873 | 3.846 | 3.980 | 3.938 | 4.027 | 3.879 | 4.024 |

| Species | Elbaite | Elbaite | Elbaite | Elbaite | Cellerite | Cellerite | Foite | Cellerite | Cellerite |
|---------|---------|---------|---------|---------|-----------|-----------|-------|-----------|-----------|
|---------|---------|---------|---------|---------|-----------|-----------|-------|-----------|-----------|

<sup>a</sup> Calculated by stoichiometry (see text);

<sup>b</sup> Estimated with the procedure of Pesquera et al. (2016);

<sup>c</sup> Determined by Mössbauer spectroscopy.

Errors for oxides and fluorine are standard deviations (in brackets)

**Empirical chemical formulae**

|           |                                                                                                                                                                                                                                                        |
|-----------|--------------------------------------------------------------------------------------------------------------------------------------------------------------------------------------------------------------------------------------------------------|
| <b>Z1</b> | $X_{(Na_{0.58} \square_{0.41} Ca_{0.01}) \Sigma 1.00} Y_{(Al_{1.62} Li_{1.02} Fe^{2+}_{0.02} Mn^{2+}_{0.32} Ti_{0.01}) \Sigma 3.00} Z_{Al_6 [T(Si_{5.95} Al_{0.05}) O_{18}] (BO_3)_3 V(OH) \Sigma 3.00} W_{(OH_{0.45} F_{0.36} O_{0.19}) \Sigma 1.00}$ |
| <b>Z2</b> | $X_{(Na_{0.62} \square_{0.36} Ca_{0.02}) \Sigma 1.00} Y_{(Al_{1.50} Li_{0.97} Fe^{2+}_{0.11} Mn^{2+}_{0.40} Ti_{0.02}) \Sigma 3.00} Z_{Al_6 [T(Si_{5.96} Al_{0.04}) O_{18}] (BO_3)_3 V(OH) \Sigma 3.00} W_{(OH_{0.50} F_{0.31} O_{0.19}) \Sigma 1.00}$ |
| <b>Z3</b> | $X_{(Na_{0.60} \square_{0.39} Ca_{0.01}) \Sigma 1.00} Y_{(Al_{1.65} Li_{1.14} Fe^{2+}_{0.31} Mn^{2+}_{0.17} Ti_{0.01}) \Sigma 3.00} Z_{Al_6 [T(Si_{5.97} Al_{0.03}) O_{18}] (BO_3)_3 V(OH) \Sigma 3.00} W_{(OH_{0.76} F_{0.11} O_{0.13}) \Sigma 1.00}$ |
| <b>Z4</b> | $X_{(Na_{0.59} \square_{0.40} Ca_{0.01}) \Sigma 1.00} Y_{(Al_{1.65} Li_{1.14} Fe^{2+}_{0.31} Mn^{2+}_{0.17} Ti_{0.01}) \Sigma 3.00} Z_{Al_6 [T(Si_{6.00} O_{18})] (BO_3)_3 V(OH) \Sigma 3.00} W_{(OH_{0.70} F_{0.15} O_{0.15}) \Sigma 1.00}$           |
| <b>Z5</b> | $X_{(Na_{0.33} \square_{0.67}) \Sigma 1.00} Y_{(Al_{0.93} Li_{0.26} Fe^{2+}_{0.56} Mn^{2+}_{1.24} Ti_{0.01}) \Sigma 3.00} Z_{Al_6 [T(Si_{6.00} O_{18})] (BO_3)_3 V(OH) \Sigma 3.00} W_{(OH_{0.97} F_{0.02} O_{0.01}) \Sigma 1.00}$                     |
| <b>Z6</b> | $X_{(Na_{0.36} \square_{0.64}) \Sigma 1.00} Y_{(Al_{0.93} Li_{0.36} Fe^{2+}_{0.72} Mn^{2+}_{0.93} Ti_{0.01}) \Sigma 2.98} Z_{Al_6 [T(Si_{6.02} O_{18})] (BO_3)_3 V(OH) \Sigma 3.00} W_{(OH_{0.94} O_{0.06}) \Sigma 1.00}$                              |
| <b>Z7</b> | $X_{(Na_{0.34} \square_{0.66}) \Sigma 1.00} Y_{(Al_{0.75} Li_{0.40} Fe^{2+}_{0.92} Fe^{3+}_{0.04} Mn^{2+}_{0.75} Ti_{0.01}) \Sigma 2.89} Z_{Al_6 [T(Si_{6.11} O_{18})] (BO_3)_3 V(OH) \Sigma 3.00} W_{(OH_{0.95} F_{0.05}) \Sigma 1.00}$               |
| <b>Z8</b> | $X_{(Na_{0.46} \square_{0.52} Ca_{0.02}) \Sigma 1.00} Y_{(Al_{1.15} Li_{0.53} Fe^{2+}_{0.40} Mn^{2+}_{0.86} Ti_{0.01}) \Sigma 3.00} Z_{Al_6 [T(Si_{5.97} Al_{0.03}) O_{18}] (BO_3)_3 V(OH) \Sigma 3.00} W_{(OH_{0.76} F_{0.12} O_{0.12}) \Sigma 1.00}$ |
| <b>Z9</b> | $X_{(Na_{0.39} \square_{0.60} Ca_{0.01}) \Sigma 1.00} Y_{(Al_{0.88} Li_{0.32} Fe^{2+}_{0.68} Mn^{2+}_{1.00} Ti_{0.01}) \Sigma 3.00} Z_{Al_6 [T(Si_{5.96} Al_{0.04}) O_{18}] (BO_3)_3 V(OH) \Sigma 3.00} W_{(OH_{0.97} F_{0.03}) \Sigma 1.00}$          |

**Table S2.6.** Average chemical composition and atoms per formula unit (a.p.f.u) for the different zones of Testa Rossa sample (San Piero in Campo, Elba Island, Italy) with the relative empirical formula.

| Prismatic section              |                    | Termination        |                    |                    |
|--------------------------------|--------------------|--------------------|--------------------|--------------------|
|                                | Z1                 | Z2                 | Z3                 | Z4                 |
|                                | <i>n</i> = 11      | <i>n</i> = 6       | <i>n</i> = 1       | <i>n</i> = 2       |
| SiO <sub>2</sub> wt%           | 39.35(52)          | 38.97(36)          | 35.65              | 38.03(31)          |
| TiO <sub>2</sub>               | -                  | 0.03(3)            | 0.01               | -                  |
| B <sub>2</sub> O <sub>3</sub>  | 11.40 <sup>a</sup> | 11.26 <sup>a</sup> | 10.63 <sup>a</sup> | 11.10 <sup>a</sup> |
| Al <sub>2</sub> O <sub>3</sub> | 43.22(29)          | 41.59(45)          | 40.92              | 42.13(20)          |
| FeO <sub>tot</sub>             | 0.03(2)            | 0.08(9)            | 0.02               | 0.06(2)            |
| MnO                            | 0.06(3)            | 1.64(91)           | 2.66               | 0.78(10)           |
| ZnO                            | -                  | 0.06(4)            | -                  | -                  |
| MgO                            | -                  | 0.05(10)           | -                  | 0.01               |
| CaO                            | 0.01(1)            | 0.01(3)            | 0.01               | 0.01               |
| Na <sub>2</sub> O              | 1.89(9)            | 2.21(4)            | 2.26               | 2.30(1)            |
| Li <sub>2</sub> O              | 1.99 <sup>b</sup>  | 1.88 <sup>b</sup>  | 1.39 <sup>b</sup>  | 1.84 <sup>b</sup>  |
| F                              | 0.20(8)            | 0.20(9)            | 0.28               | 0.21(11)           |
| -O ≡ F                         | -0.08              | -0.08              | -0.12              | -0.09              |
| H <sub>2</sub> O               | 3.74 <sup>a</sup>  | 3.68 <sup>a</sup>  | 3.22 <sup>a</sup>  | 3.52 <sup>a</sup>  |
| Total                          | 101.78             | 101.58             | 96.88              | 99.92              |
| Atoms normalized to 31 anions  |                    |                    |                    |                    |
| Si apfu                        | 6.000              | 6.017              | 5.830              | 5.955              |
| Ti                             | -                  | 0.003              | 0.001              | -                  |
| B                              | 3.000              | 3.000              | 3.000              | 3.000              |
| Al                             | 7.767              | 7.569              | 7.887              | 7.775              |
| Fe <sup>2+</sup>               | 0.004              | 0.010              | 0.003              | 0.008              |
| Mn <sup>2+</sup>               | 0.008              | 0.214              | 0.369              | 0.103              |
| Zn                             | -                  | 0.007              | -                  | -                  |
| Mg                             | -                  | 0.012              | -                  | 0.001              |
| Ca                             | 0.001              | 0.001              | 0.001              | 0.001              |
| Na                             | 0.558              | 0.661              | 0.715              | 0.697              |
| Li                             | 1.221              | 1.168              | 0.914              | 1.159              |
| F                              | 0.095              | 0.096              | 0.143              | 0.102              |
| OH                             | 3.801              | 3.792              | 3.509              | 3.673              |
| OH+F                           | 3.895              | 3.888              | 3.652              | 3.775              |
| Species                        | Elbaite            | Elbaite            | Elbaite            | Elbaite            |

<sup>a</sup> Calculated by stoichiometry (see text)

<sup>b</sup> Estimated with the procedure of Pesquera et al. (2016)

Errors for oxides and fluorine are standard deviations (in brackets)

#### Empirical chemical formulae

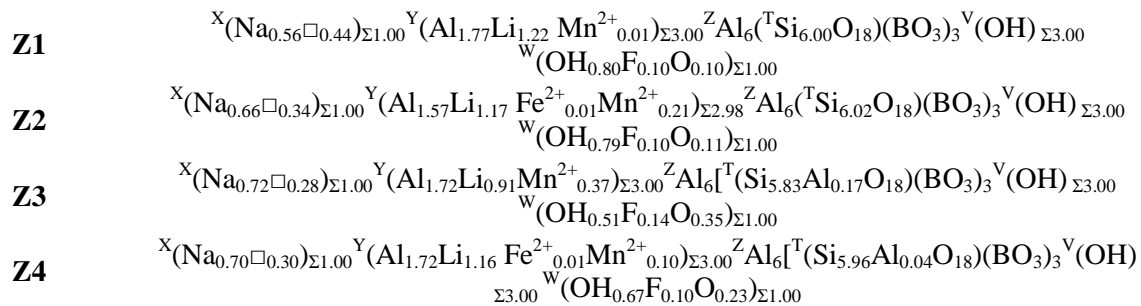

**Table S2.7.** Average chemical composition and atoms per formula unit (a.p.f.u) for the different zones of Testa Scura sample (San Piero in Campo, Elba Island, Italy) with the relative empirical formula.

| Prismatic section              |                    |                    |                    | Termination        |                    |                    |                    |                    |                    |
|--------------------------------|--------------------|--------------------|--------------------|--------------------|--------------------|--------------------|--------------------|--------------------|--------------------|
|                                | Z1                 | Z2                 | Z3                 | Z4                 | Z5                 | Z6                 | Z7                 | Z8                 | Z9                 |
|                                | n = 10             | n = 2              | n = 1              | n = 7              | n = 3              | n = 2              | n = 1              | n = 3              | n = 1              |
| SiO <sub>2</sub> wt%           | 37.89(54)          | 37.53(5)           | 36.95              | 36.80(11)          | 37.58(25)          | 37.10(23)          | 37.51              | 36.99(27)          | 36.29              |
| TiO <sub>2</sub>               | 0.15(3)            | 0.26(1)            | 0.24               | 0.13(3)            | 0.0682)            | 0.10(1)            | 0.04               | 0.03(1)            | 0.07               |
| B <sub>2</sub> O <sub>3</sub>  | 11.05 <sup>a</sup> | 10.82 <sup>a</sup> | 10.67 <sup>a</sup> | 10.69 <sup>a</sup> | 10.88 <sup>a</sup> | 10.76 <sup>a</sup> | 10.96 <sup>a</sup> | 10.76 <sup>a</sup> | 10.63 <sup>a</sup> |
| Al <sub>2</sub> O <sub>3</sub> | 40.83(79)          | 37.50(32)          | 36.16              | 36.19(23)          | 38.84(56)          | 36.90(72)          | 39.06              | 37.14(66)          | 35.95              |
| FeO <sub>tot</sub>             | 0.28(31)           | 2.35(42)           | 3.41               | 2.08(83)           | 0.72(14)           | 2.27(48)           | 0.98               | 1.62(74)           | 2.30               |
| MnO                            | 3.65(82)           | 6.04(73)           | 8.02               | 11.08(68)          | 6.80(78)           | 9.20(20)           | 8.49               | 10.01(10)          | 11.12              |
| ZnO                            | 0.02(4)            | 0.06(4)            | -                  | 0.05(5)            | 0.07(5)            | 0.05(2)            | -                  | -                  | 0.13               |
| MgO                            | -                  | 0.01(1)            | 0.01               | 0.03(1)            | 0.03(1)            | 0.07(2)            | 0.03               | 0.07(3)            | 0.30               |
| CaO                            | 0.08(2)            | 0.08(1)            | 0.05               | 0.02(1)            | 0.01(1)            | 0.03(3)            | -                  | -                  | -                  |
| Na <sub>2</sub> O              | 1.89(11)           | 2.13(6)            | 1.93               | 1.32(6)            | 1.06(88)           | 1.30(5)            | 1.17               | 1.10(7)            | 1.31               |
| K <sub>2</sub> O               | -                  | 0.01(1)            | 0.02               | 0.02(1)            | 0.02(1)            | 0.03(1)            | 0.03               | 0.02               | 0.00               |
| Li <sub>2</sub> O              | 1.47 <sup>b</sup>  | 1.08 <sup>b</sup>  | 0.66 <sup>b</sup>  | 0.38 <sup>b</sup>  | 1.01 <sup>b</sup>  | 0.60 <sup>b</sup>  | 0.73 <sup>b</sup>  | 0.54 <sup>b</sup>  | 0.29 <sup>b</sup>  |
| F                              | 0.76(32)           | 1.16(13)           | 0.72               | 0.34(14)           | 0.22(4)            | 0.10(1)            | 0.00               | 0.03(3)            | 0.00               |
| -O ≡ F                         | -0.32              | -0.49              | -0.30              | -0.14              | -0.09              | -0.04              | -0.00              | -0.01              | -0.00              |
| H <sub>2</sub> O               | 3.26 <sup>a</sup>  | 2.99 <sup>a</sup>  | 3.11 <sup>a</sup>  | 3.43 <sup>a</sup>  | 3.76 <sup>a</sup>  | 3.61 <sup>a</sup>  | 3.66 <sup>a</sup>  | 3.68 <sup>a</sup>  | 3.63 <sup>a</sup>  |
| Total                          | 100.99             | 101.51             | 101.65             | 102.39             | 100.82             | 102.07             | 102.68             | 102.00             | 102.05             |
| Atoms normalized to 31 anions  |                    |                    |                    |                    |                    |                    |                    |                    |                    |
| Si apfu                        | 5.960              | 6.028              | 6.021              | 5.982              | 6.003              | 5.990              | 5.950              | 5.973              | 5.932              |
| Ti                             | 0.018              | 0.031              | 0.030              | 0.016              | 0.008              | 0.012              | 0.005              | 0.004              | 0.008              |
| B                              | 3.000              | 3.000              | 3.000              | 3.000              | 3.000              | 3.000              | 3.000              | 3.000              | 3.000              |
| Al                             | 7.569              | 7.099              | 6.944              | 6.933              | 7.310              | 7.022              | 7.302              | 7.067              | 6.926              |
| Fe <sup>2+</sup>               | 0.036              | 0.316              | 0.465              | 0.282              | 0.096              | 0.307              | 0.130              | 0.219              | 0.314              |
| Mn <sup>2+</sup>               | 0.486              | 0.821              | 1.107              | 1.525              | 0.919              | 1.258              | 1.140              | 1.369              | 1.540              |
| Zn                             | 0.002              | 0.007              | -                  | 0.006              | 0.008              | 0.006              | -                  | -                  | 0.016              |
| Mg                             | -                  | 0.001              | 0.000              | 0.007              | 0.007              | 0.017              | 0.007              | 0.017              | 0.073              |
| Ca                             | 0.014              | 0.014              | 0.009              | 0.000              | 0.000              | 0.005              | -                  | -                  | -                  |
| Na                             | 0.577              | 0.665              | 0.609              | 0.415              | 0.329              | 0.408              | 0.360              | 0.344              | 0.415              |
| K                              | 0.000              | 0.001              | 0.003              | 0.003              | 0.000              | 0.005              | 0.005              | 0.002              | -                  |
| Li                             | 0.930              | 0.698              | 0.433              | 0.248              | 0.649              | 0.390              | 0.466              | 0.351              | 0.191              |
| F                              | 0.376              | 0.590              | 0.370              | 0.175              | 0.110              | 0.051              | 0.000              | 0.017              | -                  |
| OH                             | 3.423              | 3.198              | 3.377              | 3.722              | 3.879              | 3.890              | 3.878              | 3.959              | 3.963              |
| OH+F                           | 3.799              | 3.788              | 3.747              | 3.897              | 3.989              | 3.941              | 3.878              | 3.976              | 3.963              |
| Species                        | Elbaite            | Fluor-elbaite      | Tsilaisite         | Celleriite         | Rossmannite        | Celleriite         | Celleriite         | Celleriite         | Celleriite         |

<sup>a</sup> Calculated by stoichiometry (see text);

<sup>b</sup> Estimated with the procedure of Pesquera et al. (2016)

Errors for oxides and fluorine are standard deviations (in brackets)

#### Empirical chemical formulae

|           |                                                                                                                                                                                                                                                           |
|-----------|-----------------------------------------------------------------------------------------------------------------------------------------------------------------------------------------------------------------------------------------------------------|
| <b>Z1</b> | $X_{(Na_{0.58} \square_{0.41} Ca_{0.01}) \Sigma 1.00} Y_{(Al_{1.53} Li_{0.93} Mn^{2+}_{0.49} Fe^{2+}_{0.04} Ti_{0.02}) \Sigma 3.00} Z_{Al_6 [T(Si_{5.96} Al_{0.04} O_{18})] (BO_3)_3} V_{(OH) \Sigma 3.00} W_{(OH_{0.42} F_{0.38} O_{0.20}) \Sigma 1.00}$ |
| <b>Z2</b> | $X_{(Na_{0.67} \square_{0.32} Ca_{0.01}) \Sigma 1.00} Y_{(Al_{1.10} Li_{0.70} Mn^{2+}_{0.82} Fe^{2+}_{0.32} Ti_{0.03}) \Sigma 2.97} Z_{Al_6 [T(Si_{6.03} O_{18})] (BO_3)_3} V_{(OH) \Sigma 3.00} W_{(OH_{0.20} F_{0.59} O_{0.21}) \Sigma 1.00}$           |
| <b>Z3</b> | $X_{(Na_{0.61} \square_{0.38} Ca_{0.01}) \Sigma 1.00} Y_{(Al_{0.94} Li_{0.43} Mn^{2+}_{1.11} Fe^{2+}_{0.47} Ti_{0.03}) \Sigma 2.98} Z_{Al_6 [T(Si_{6.02} O_{18})] (BO_3)_3} V_{(OH) \Sigma 3.00} W_{(OH_{0.38} F_{0.59} O_{0.03}) \Sigma 1.00}$           |
| <b>Z4</b> | $X_{(Na_{0.42} \square_{0.58}) \Sigma 1.00} Y_{(Al_{0.91} Li_{0.25} Mn^{2+}_{1.53} Fe^{2+}_{0.28} Ti_{0.02}) \Sigma 3.00} Z_{Al_6 [T(Si_{5.98} Al_{0.02} O_{18})] (BO_3)_3} V_{(OH) \Sigma 3.00} W_{(OH_{0.72} F_{0.18} O_{0.10}) \Sigma 1.00}$           |
| <b>Z5</b> | $X_{(Na_{0.33} \square_{0.67}) \Sigma 1.00} Y_{(Al_{1.31} Li_{0.65} Mn^{2+}_{0.92} Fe^{2+}_{0.10} Ti_{0.01}) \Sigma 3.00} Z_{Al_6 [T(Si_{6.00} O_{18})] (BO_3)_3} V_{(OH) \Sigma 3.00} W_{(OH_{0.88} F_{0.11} O_{0.01}) \Sigma 1.00}$                     |
| <b>Z6</b> | $X_{(Na_{0.41} \square_{0.59}) \Sigma 1.00} Y_{(Al_{1.01} Li_{0.39} Mn^{2+}_{1.26} Fe^{2+}_{0.31} Ti_{0.01}) \Sigma 3.00} Z_{Al_6 [T(Si_{5.99} Al_{0.01} O_{18})] (BO_3)_3} V_{(OH) \Sigma 3.00} W_{(OH_{0.89} F_{0.05} O_{0.06}) \Sigma 1.00}$           |
| <b>Z7</b> | $X_{(Na_{0.36} \square_{0.64}) \Sigma 1.00} Y_{(Al_{1.25} Li_{0.47} Mn^{2+}_{1.14} Fe^{2+}_{0.13} Ti_{0.01}) \Sigma 3.00} Z_{Al_6 [T(Si_{5.95} Al_{0.05} O_{18})] (BO_3)_3} V_{(OH) \Sigma 3.00} W_{(OH_{0.88} O_{0.12}) \Sigma 1.00}$                    |
| <b>Z8</b> | $X_{(Na_{0.34} \square_{0.66}) \Sigma 1.00} Y_{(Al_{1.05} Li_{0.35} Mn^{2+}_{1.38} Fe^{2+}_{0.22}) \Sigma 3.00} Z_{Al_6 [T(Si_{5.97} Al_{0.03} O_{18})] (BO_3)_3} V_{(OH) \Sigma 3.00} W_{(OH_{0.96} F_{0.02} O_{0.02}) \Sigma 1.00}$                     |
| <b>Z9</b> | $X_{(Na_{0.41} \square_{0.59}) \Sigma 1.00} Y_{(Al_{0.86} Li_{0.19} Mn^{2+}_{1.54} Fe^{2+}_{0.31} Ti_{0.01}) \Sigma 3.00} Z_{Al_6 [T(Si_{5.93} Al_{0.07} O_{18})] (BO_3)_3} V_{(OH) \Sigma 3.00} W_{(OH_{0.96} O_{0.04}) \Sigma 1.00}$                    |

**Table S2.8.** Average chemical composition and atoms per formula unit (a.p.f.u) for the different zones of Testa Viola sample (San Piero in Campo, Elba Island, Italy) with the relative empirical formula.

| Prismatic section              |                    |                    |                    | Termination        |                    |
|--------------------------------|--------------------|--------------------|--------------------|--------------------|--------------------|
|                                | Z1                 | Z2                 | Z3                 | Z4                 | Z5                 |
|                                | <i>n</i> = 4       | <i>n</i> = 1       | <i>n</i> = 1       | <i>n</i> = 4       | <i>n</i> = 12      |
| SiO <sub>2</sub> wt%           | 38.08(91)          | 39.46              | 37.01              | 38.78(29)          | 37.80(40)          |
| TiO <sub>2</sub>               | 0.02(2)            | 0.02               | -                  | 0.03(1)            | 0.04(2)            |
| B <sub>2</sub> O <sub>3</sub>  | 11.11 <sup>a</sup> | 11.40 <sup>a</sup> | 10.94 <sup>a</sup> | 11.16 <sup>a</sup> | 10.99 <sup>a</sup> |
| Al <sub>2</sub> O <sub>3</sub> | 42.42(72)          | 42.97              | 42.55              | 40.83(55)          | 40.39(92)          |
| FeO <sub>tot</sub>             | 0.04(3)            | 0.01               | 0.04               | 0.32(13)           | 0.52(28)           |
| MnO                            | 0.10(10)           | 0.04               | 0.03               | 1.87(76)           | 3.28(87)           |
| ZnO                            | 0.01(1)            | 0.03               | 0.01               | 0.05               | 0.04(4)            |
| CaO                            | 0.12(13)           | 0.02               | 0.01               | 0.01(1)            | 0.03(2)            |
| Na <sub>2</sub> O              | 1.96(6)            | 2.07               | 2.07               | 2.24(3)            | 2.21(12)           |
| Li <sub>2</sub> O              | 1.92 <sup>b</sup>  | 2.04 <sup>b</sup>  | 1.78 <sup>b</sup>  | 1.86 <sup>b</sup>  | 1.53 <sup>b</sup>  |
| F                              | 0.43(32)           | 0.22               | 0.12               | 0.13(7)            | 0.20(12)           |
| -O ≡ F                         | -0.18              | -0.09              | -0.05              | -0.05              | -0.08              |
| H <sub>2</sub> O               | 3.47 <sup>a</sup>  | 3.69 <sup>a</sup>  | 3.48 <sup>a</sup>  | 3.69 <sup>a</sup>  | 3.49 <sup>a</sup>  |
| Total                          | 99.52              | 101.86             | 98.01              | 100.93             | 100.44             |

**Atoms normalized to 31 anions**

|                  |       |       |       |       |       |
|------------------|-------|-------|-------|-------|-------|
| Si apfu          | 5.956 | 6.018 | 5.882 | 6.041 | 5.980 |
| Ti               | 0.002 | 0.002 | -     | 0.003 | 0.005 |
| B                | 3.000 | 3.000 | 3.000 | 3.000 | 3.000 |
| Al               | 7.818 | 7.723 | 7.970 | 7.497 | 7.530 |
| Fe <sup>2+</sup> | 0.005 | 0.001 | 0.006 | 0.042 | 0.069 |
| Mn <sup>2+</sup> | 0.013 | 0.005 | 0.004 | 0.246 | 0.439 |
| Zn               | 0.002 | 0.003 | 0.001 | 0.005 | 0.004 |
| Ca               | 0.020 | 0.003 | 0.001 | -     | 0.006 |
| Na               | 0.594 | 0.612 | 0.639 | 0.677 | 0.677 |
| Li               | 1.208 | 1.251 | 1.138 | 1.165 | 0.973 |
| F                | 0.210 | 0.104 | 0.061 | 0.062 | 0.100 |
| OH               | 3.622 | 3.759 | 3.695 | 3.834 | 3.687 |
| OH+F             | 3.832 | 3.863 | 3.755 | 3.895 | 3.787 |

| Species | Elbaite | Elbaite | Elbaite | Elbaite | Elbaite |
|---------|---------|---------|---------|---------|---------|
|---------|---------|---------|---------|---------|---------|

<sup>a</sup> Calculated by stoichiometry (see text)

<sup>b</sup> Estimated with the procedure of Pesquera et al. (2016)

Errors for oxides and fluorine are standard deviations (in brackets)

**Empirical chemical formulae**

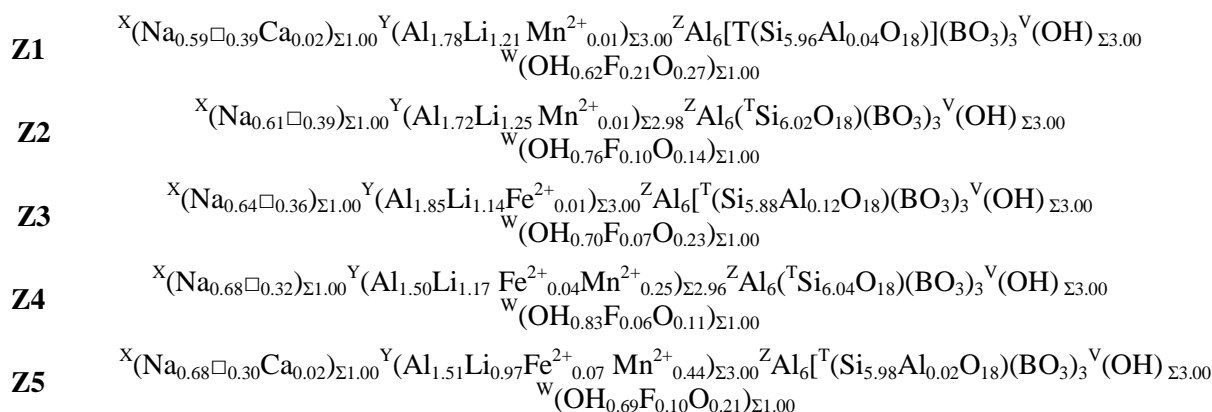



**Table S2.9.** Average chemical composition and atoms per formula unit (a.p.f.u) for the different zones of the prismatic section of fragment I and OGX of Violet Cap sample (San Piero in Campo, Elba Island, Italy) with the relative empirical formula.

| Fragment I                                  |                    |                    |                    |                    |                    |
|---------------------------------------------|--------------------|--------------------|--------------------|--------------------|--------------------|
| Prismatic section I                         |                    | OGX                |                    |                    |                    |
| Z1                                          |                    | Z2                 | Z3                 | Z4                 | Z5                 |
| <i>n</i> = 12                               |                    | <i>n</i> = 3       | <i>n</i> = 2       | <i>n</i> = 3       | <i>n</i> = 1       |
| SiO <sub>2</sub> wt%                        | 37.95(20)          | 37.75(41)          | 38.12(12)          | 38.01(3)           | 35.93              |
| TiO <sub>2</sub>                            | 0.05(2)            | 0.14(7)            | 0.06(4)            | 0.06(4)            | 0.01               |
| B <sub>2</sub> O <sub>3</sub>               | 11.06 <sup>a</sup> | 10.89 <sup>a</sup> | 11.06 <sup>a</sup> | 10.97 <sup>a</sup> | 10.77 <sup>a</sup> |
| Al <sub>2</sub> O <sub>3</sub>              | 41.77(33)          | 39.11(39)          | 41.30(61)          | 39.98(21)          | 42.60              |
| FeO <sub>tot</sub>                          | 0.03(3)            | 0.13(6)            | 0.05(2)            | 0.07(2)            | -                  |
| MnO <sub>tot</sub>                          | 0.62(51)           | 4.00(40)           | 0.93(26)           | 2.72(52)           | 0.72               |
| CaO                                         | 0.34(7)            | 0.06(4)            | 0.03               | 0.07(1)            | 0.06               |
| Na <sub>2</sub> O                           | 1.85(4)            | 2.36(3)            | 2.18(16)           | 2.31(11)           | 2.25               |
| K <sub>2</sub> O                            | 0.01(1)            | 0.01(1)            | 0.02(1)            | 0.01(2)            | -                  |
| Li <sub>2</sub> O                           | 1.90 <sup>b</sup>  | 1.63 <sup>b</sup>  | 1.93 <sup>b</sup>  | 1.78 <sup>b</sup>  | 1.54 <sup>b</sup>  |
| F                                           | 0.99(9)            | 0.73(17)           | 0.49(28)           | 0.41(14)           | 0.13               |
| -O ≡ F                                      | -0.42              | -0.31              | -0.21              | -0.17              | -0.05              |
| H <sub>2</sub> O                            | 3.18 <sup>a</sup>  | 3.10 <sup>a</sup>  | 3.43 <sup>a</sup>  | 3.34 <sup>a</sup>  | 3.22 <sup>a</sup>  |
| MnO <sup>d</sup>                            | 0.62               | 2.85               | 0.60               | 1.75               | 0.458              |
| Mn <sub>2</sub> O <sub>3</sub> <sup>d</sup> | -                  | 1.28               | 0.37               | 1.08               | 0.290              |
| Total                                       | 99.35              | 99.66              | 99.41              | 99.59              | 97.19              |
| Atoms normalized to 31 anions               |                    |                    |                    |                    |                    |
| Si apfu                                     | 5.967              | 6.024              | 5.992              | 6.021              | 5.799              |
| Ti                                          | 0.006              | 0.017              | 0.007              | 0.007              | 0.001              |
| B                                           | 3.000              | 3.000              | 3.000              | 3.000              | 3.000              |
| Al                                          | 7.740              | 7.355              | 7.651              | 7.464              | 8.102              |
| Fe <sup>3+</sup>                            | -                  | 0.017              | 0.006              | 0.009              | -                  |
| Fe <sup>2+</sup>                            | 0.003              | -                  | -                  | -                  | -                  |
| Mn <sup>3+</sup>                            | -                  | 0.155              | 0.044              | 0.130              | 0.036              |
| Mn <sup>2+</sup>                            | 0.083              | 0.385              | 0.080              | 0.235              | 0.063              |
| Ca                                          | 0.057              | 0.010              | 0.005              | 0.013              | 0.011              |
| Na                                          | 0.563              | 0.732              | 0.664              | 0.708              | 0.704              |
| K                                           | 0.002              | 0.003              | 0.005              | 0.003              | -                  |
| Li                                          | 1.201              | 1.046              | 1.220              | 1.134              | 1.000              |
| F                                           | 0.494              | 0.370              | 0.243              | 0.205              | 0.067              |
| OH                                          | 3.334              | 3.301              | 3.595              | 3.529              | 3.505              |
| OH+F                                        | 3.828              | 3.671              | 3.838              | 3.734              | 3.572              |
| Species                                     | Fluor-elbaite      | Elbaite            | Elbaite            | Elbaite            | Elbaite            |

<sup>a</sup> Calculated by stoichiometry (see text);

<sup>b</sup> Estimated with the procedure of Pesquera et al. (2016);

<sup>c</sup> Determined by Mössbauer spectroscopy

<sup>d</sup> Determined by OAS (Altieri et al., 2022b)

Errors for oxides and fluorine are standard deviations (in brackets)

#### Empirical chemical formulae

|           |                                                                                                                                                                                                                                                                                                                                                                                               |
|-----------|-----------------------------------------------------------------------------------------------------------------------------------------------------------------------------------------------------------------------------------------------------------------------------------------------------------------------------------------------------------------------------------------------|
| <b>Z1</b> | ${}^X(\text{Na}_{0.56}\square_{0.38}\text{Ca}_{0.06})_{\Sigma 1.00} {}^Y(\text{Al}_{1.71}\text{Li}_{1.20} \text{Mn}^{2+}_{0.08}\text{Ti}_{0.01})_{\Sigma 3.00} {}^Z\text{Al}_6[{}^T(\text{Si}_{5.97}\text{Al}_{0.03})\text{O}_{18}](\text{BO}_3)_3 {}^V(\text{OH})_{\Sigma 3.00} {}^W(\text{OH}_{0.33}\text{F}_{0.49}\text{O}_{0.18})_{\Sigma 1.00}$                                          |
| <b>Z2</b> | ${}^X(\text{Na}_{0.73}\square_{0.26}\text{Ca}_{0.01})_{\Sigma 1.00} {}^Y(\text{Al}_{1.36}\text{Li}_{1.05} \text{Mn}^{2+}_{0.38}\text{Mn}^{3+}_{0.16}\text{Fe}^{3+}_{0.02}\text{Ti}_{0.01})_{\Sigma 2.98} {}^Z\text{Al}_6[{}^T\text{Si}_{6.02}\text{O}_{18}](\text{BO}_3)_3 {}^V(\text{OH})_{\Sigma 3.00} {}^W(\text{OH}_{0.30}\text{F}_{0.37}\text{O}_{0.33})_{\Sigma 1.00}$                  |
| <b>Z3</b> | ${}^X(\text{Na}_{0.66}\square_{0.33}\text{Ca}_{0.01})_{\Sigma 1.00} {}^Y(\text{Al}_{1.64}\text{Li}_{1.22}\text{Mn}^{2+}_{0.08}\text{Mn}^{3+}_{0.04}\text{Fe}^{3+}_{0.01}\text{Ti}_{0.01})_{\Sigma 3.00} {}^Z\text{Al}_6[{}^T(\text{Si}_{5.99}\text{Al}_{0.01})\text{O}_{18}](\text{BO}_3)_3 {}^V(\text{OH})_{\Sigma 3.00} {}^W(\text{OH}_{0.59}\text{F}_{0.24}\text{O}_{0.16})_{\Sigma 1.00}$ |
| <b>Z4</b> | ${}^X(\text{Na}_{0.71}\square_{0.28}\text{Ca}_{0.01})_{\Sigma 1.00} {}^Y(\text{Al}_{1.36}\text{Li}_{1.13} \text{Mn}^{2+}_{0.24}\text{Mn}^{3+}_{0.13}\text{Fe}^{3+}_{0.01}\text{Ti}_{0.01})_{\Sigma 2.98} {}^Z\text{Al}_6[{}^T\text{Si}_{6.02}\text{O}_{18}](\text{BO}_3)_3 {}^V(\text{OH})_{\Sigma 3.00} {}^W(\text{OH}_{0.53}\text{F}_{0.21}\text{O}_{0.26})_{\Sigma 1.00}$                  |
| <b>Z5</b> | ${}^X(\text{Na}_{0.70}\square_{0.29}\text{Ca}_{0.01})_{\Sigma 1.00} {}^Y(\text{Al}_{1.90}\text{Li}_{1.00} \text{Mn}^{2+}_{0.06} \text{Mn}^{3+}_{0.04})_{\Sigma 3.00} {}^Z\text{Al}_6[{}^T(\text{Si}_{5.80}\text{Al}_{0.20})\text{O}_{18}](\text{BO}_3)_3 {}^V(\text{OH})_{\Sigma 3.00} {}^W(\text{OH}_{0.51}\text{F}_{0.07}\text{O}_{0.42})_{\Sigma 1.00}$                                    |

**Table S2.10.** Average chemical composition and atoms per formula unit (a.p.f.u) for the different zones of OGR and the prismatic section of fragment II of Violet Cap sample (San Piero in Campo, Elba Island, Italy) with the relative empirical formula.

| Fragment II                                 |                    |                    |                      |                    |                    |                    |                    |
|---------------------------------------------|--------------------|--------------------|----------------------|--------------------|--------------------|--------------------|--------------------|
| OGR                                         |                    |                    | Prismatic section II |                    | OGZ                |                    |                    |
| Z6                                          | Z7                 |                    | Z8                   | Z9                 | Z10                | Z11                | Z12                |
| <i>n</i> = 3                                | <i>n</i> = 1       |                    | <i>n</i> = 17        | <i>n</i> = 30      | <i>n</i> = 1       | <i>n</i> = 1       | <i>n</i> = 1       |
| SiO <sub>2</sub> wt%                        | 37.14(31)          | 36.77              | 36.81(20)            | 38.23(95)          | 37.29              | 37.68              | 35.79              |
| TiO <sub>2</sub>                            | 0.26(11)           | 0.20               | 0.03                 | 0.01               | 0.12               | 0.02               | -                  |
| B <sub>2</sub> O <sub>3</sub>               | 10.67 <sup>a</sup> | 10.76 <sup>a</sup> | 10.85 <sup>a</sup>   | 11.16 <sup>a</sup> | 10.79 <sup>a</sup> | 10.95 <sup>a</sup> | 10.74 <sup>a</sup> |
| Al <sub>2</sub> O <sub>3</sub>              | 36.66(39)          | 39.93              | 41.79(45)            | 42.64(58)          | 38.25              | 40.42              | 42.52              |
| FeO <sub>tot</sub>                          | 0.23(25)           | 0.08               | 0.02                 | 0.02(2)            | 0.37               | 0.23               | 0.03               |
| MnO                                         | 6.77(47)           | 2.47               | 0.29(11)             | 0.08(5)            | 5.86               | 2.76               | 0.68               |
| CaO                                         | 0.24(10)           | 0.11               | 0.19(13)             | 0.02(3)            | 0.02               | 0.01               | 0.06               |
| Na <sub>2</sub> O                           | 2.73(13)           | 2.27               | 1.87                 | 1.86(11)           | 2.42               | 2.55               | 2.18               |
| K <sub>2</sub> O                            | 0.02(1)            | 0.02               | 0.01                 | 0.01(1)            | 0.03               | 0.05               | -                  |
| Li <sub>2</sub> O                           | 1.39 <sup>b</sup>  | 1.67 <sup>b</sup>  | 1.81 <sup>b</sup>    | 1.92 <sup>b</sup>  | 1.34 <sup>b</sup>  | 1.65 <sup>b</sup>  | 1.53 <sup>b</sup>  |
| F                                           | 1.30(17)           | 0.80               | 0.75(18)             | 0.31(16)           | -                  | -                  | -                  |
| -O ≡ F                                      | -0.55              | -0.34              | -0.31                | -0.13              | -0.00              | -0.00              | -0.00              |
| H <sub>2</sub> O                            | 2.84 <sup>a</sup>  | 3.15 <sup>a</sup>  | 3.22 <sup>a</sup>    | 3.60 <sup>a</sup>  | 3.29 <sup>a</sup>  | 3.40 <sup>a</sup>  | 3.30 <sup>a</sup>  |
| MnO <sup>d</sup>                            | 6.77               | 2.47               | 0.29                 | 0.08               | 4.27               | 2.01               | 0.49               |
| Mn <sub>2</sub> O <sub>3</sub> <sup>d</sup> | -                  | -                  | -                    | -                  | 1.77               | 0.83               | 0.21               |
| Total                                       | 99.69              | 97.88              | 97.33                | 99.72              | 99.81              | 99.84              | 96.85              |
| Atoms normalized to 31 anions               |                    |                    |                      |                    |                    |                    |                    |
| Si apfu                                     | 6.052              | 5.939              | 5.897                | 5.955              | 6.007              | 5.981              | 5.794              |
| Ti                                          | 0.032              | 0.025              | 0.004                | 0.001              | 0.015              | 0.003              | -                  |
| B                                           | 3.000              | 3.000              | 3.000                | 3.000              | 3.000              | 3.000              | 3.000              |
| Al                                          | 7.040              | 7.602              | 7.891                | 7.828              | 7.261              | 7.561              | 8.113              |
| Fe <sup>3+</sup>                            | -                  | -                  | -                    | -                  | 0.049              | 0.031              | 0.004              |
| Fe <sup>2+</sup>                            | 0.031              | 0.010              | 0.003                | 0.002              | -                  | -                  | -                  |
| Mn <sup>3+</sup>                            | -                  | -                  | -                    | -                  | 0.217              | 0.100              | 0.026              |
| Mn <sup>2+</sup>                            | 0.934              | 0.339              | 0.039                | 0.010              | 0.583              | 0.271              | 0.068              |
| Ca                                          | 0.041              | 0.018              | 0.033                | 0.003              | 0.003              | 0.002              | 0.011              |
| Na                                          | 0.862              | 0.711              | 0.582                | 0.563              | 0.755              | 0.786              | 0.683              |
| K                                           | 0.003              | 0.004              | 0.002                | 0.003              | 0.006              | 0.010              | -                  |
| Li                                          | 0.911              | 1.085              | 1.166                | 1.203              | 0.868              | 1.053              | 0.996              |
| F                                           | 0.669              | 0.408              | 0.378                | 0.154              | -                  | -                  | -                  |
| OH                                          | 3.086              | 3.396              | 3.445                | 3.736              | 3.531              | 3.595              | 3.521              |
| OH+F                                        | 3.755              | 3.804              | 3.823                | 3.890              | 3.531              | 3.595              | 3.521              |
| Species                                     | Fluor-elbaite      | Fluor-elbaite      | Elbaite              | Elbaite            | Elbaite            | Elbaite            | Elbaite            |

<sup>a</sup> Calculated by stoichiometry (see text);

<sup>b</sup> Estimated with the procedure of Pesquera et al. (2016);

<sup>c</sup> Determined by Mössbauer spectroscopy

<sup>d</sup> Determined by OAS (Altieri et al., 2022b)

Errors for oxides and fluorine are standard deviations (in brackets)

#### Empirical chemical formulae

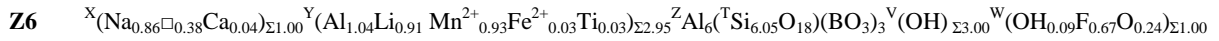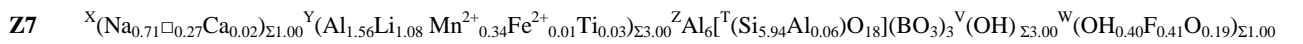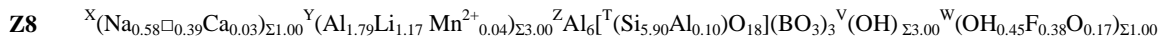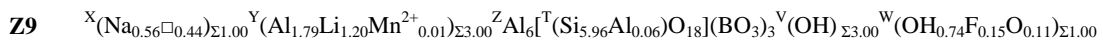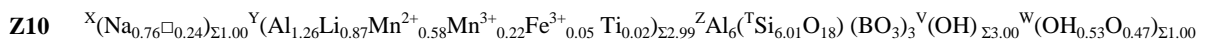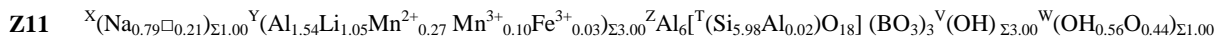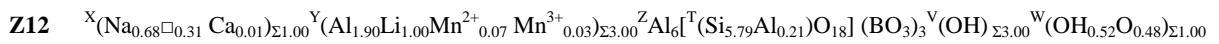

**Table S2.11.** Average chemical composition and atoms per formula unit (a.p.f.u) for the different zones of the lateral overgrowth (OGY) of Violet Cap sample (San Piero in Campo, Elba Island, Italy) with the relative empirical formula.

| Fragment II                                 |                    |                    |                    |                    |                    |                    |
|---------------------------------------------|--------------------|--------------------|--------------------|--------------------|--------------------|--------------------|
| OGY                                         |                    |                    |                    |                    |                    |                    |
|                                             | Z13                | Z14                | Z15                | Z16                | Z17                | Z18                |
|                                             | <i>n</i> = 1       | <i>n</i> = 1       | <i>n</i> = 1       | <i>n</i> = 2       | <i>n</i> = 2       | <i>n</i> = 2       |
| SiO <sub>2</sub> wt%                        | 37.32              | 37.77              | 38.06              | 38.02(22)          | 37.03(93)          | 35.56(52)          |
| TiO <sub>2</sub>                            | 0.07               | 0.07               | -                  | 0.01(1)            | 0.02(3)            | 0.01(2)            |
| B <sub>2</sub> O <sub>3</sub>               | 10.78 <sup>a</sup> | 10.88 <sup>a</sup> | 11.00 <sup>a</sup> | 10.98 <sup>a</sup> | 10.87 <sup>a</sup> | 10.67 <sup>a</sup> |
| Al <sub>2</sub> O <sub>3</sub>              | 37.78              | 38.91              | 40.59              | 39.85(15)          | 41.27(59)          | 42.21(59)          |
| FeO <sub>tot</sub>                          | 0.48               | 0.11               | 0.09               | 0.11(2)            | 0.03(3)            | 0.03(1)            |
| MnO                                         | 7.07               | 4.27               | 1.61               | 3.51(12)           | 1.22(66)           | 0.62(6)            |
| CaO                                         | 0.05               | 0.02               | -                  | 0.01               | 0.02(2)            | 0.05(1)            |
| Na <sub>2</sub> O                           | 2.31               | 2.48               | 2.49               | 2.48(1)            | 2.42(25)           | 2.29(2)            |
| K <sub>2</sub> O                            | 0.01               | 0.02               | 0.02               | -                  | 0.01(1)            | -                  |
| Li <sub>2</sub> O                           | 1.18 <sup>b</sup>  | 1.62 <sup>b</sup>  | 1.89 <sup>b</sup>  | 1.66 <sup>b</sup>  | 1.75 <sup>b</sup>  | 1.55 <sup>b</sup>  |
| F                                           | 0.15               | 0.14               | 0.08               | 0.08(3)            | 0.03(2)            | 0.04(5)            |
| -O ≡ F                                      | -0.06              | -0.06              | -0.03              | -0.03              | -0.01              | -0.02              |
| MnO <sup>d</sup>                            | 4.71               | 2.85               | 0.10               | 2.34               | 0.81               | 0.23               |
| Mn <sub>2</sub> O <sub>3</sub> <sup>d</sup> | 2.62               | 1.58               | 1.07               | 1.30               | 0.45               | 0.42               |
| H <sub>2</sub> O                            | 3.38 <sup>a</sup>  | 3.36 <sup>a</sup>  | 3.54 <sup>a</sup>  | 3.35               | 3.43 <sup>a</sup>  | 3.26 <sup>a</sup>  |
| Total                                       | 100.58             | 99.78              | 99.33              | 99.41              | 98.14              | 96.31              |
| Atoms normalized to 31 anions               |                    |                    |                    |                    |                    |                    |
| Si apfu                                     | 6.017              | 6.033              | 6.013              | 6.020              | 5.923              | 5.791              |
| Ti                                          | 0.008              | 0.008              | -                  | 0.001              | 0.003              | 0.002              |
| B                                           | 3.000              | 3.000              | 3.000              | 3.000              | 3.000              | 3.000              |
| Al                                          | 7.180              | 7.325              | 7.558              | 7.436              | 7.780              | 8.102              |
| Fe <sup>3+</sup>                            | 0.065              | 0.015              | 0.011              | 0.014              | 0.004              | 0.005              |
| Fe <sup>2+</sup>                            | -                  | -                  | -                  | -                  | -                  | -                  |
| Mn <sup>3+</sup>                            | 0.322              | 0.192              | 0.072              | 0.158              | 0.055              | 0.029              |
| Mn <sup>2+</sup>                            | 0.644              | 0.386              | 0.143              | 0.318              | 0.110              | 0.058              |
| Ca                                          | 0.008              | 0.003              | -                  | 0.002              | 0.003              | 0.008              |
| Na                                          | 0.721              | 0.768              | 0.762              | 0.762              | 0.751              | 0.723              |
| K                                           | 0.002              | 0.004              | 0.005              | 0.001              | 0.002              | -                  |
| Li                                          | 0.765              | 1.041              | 1.201              | 1.057              | 1.126              | 1.015              |
| F                                           | 0.076              | 0.069              | 0.038              | 0.039              | 0.017              | 0.019              |
| OH                                          | 3.521              | 3.581              | 3.727              | 3.673              | 3.659              | 3.537              |
| OH+F                                        | 3.697              | 3.650              | 3.765              | 3.712              | 3.676              | 3.556              |
| Species                                     | Elbaite            | Elbaite            | Elbaite            | Elbaite            | Elbaite            | Elbaite            |

<sup>a</sup> Calculated by stoichiometry (see text);

<sup>b</sup> Estimated with the procedure of Pesquera et al. (2016);

<sup>c</sup> Determined by Mössbauer spectroscopy

<sup>d</sup> Determined by OAS (Altieri et al., 20022b)

Errors for oxides and fluorine are standard deviations (in brackets)

#### Empirical chemical formulae

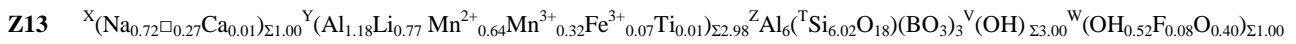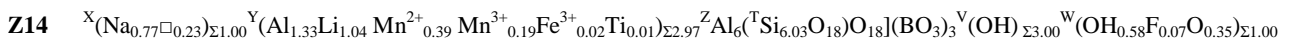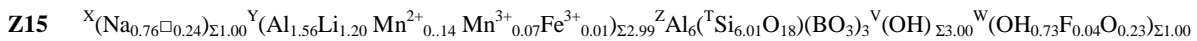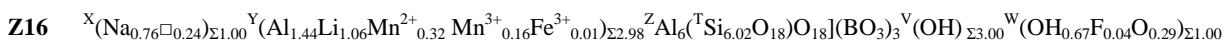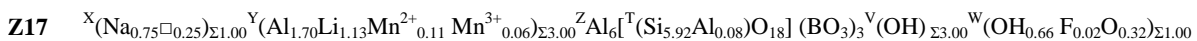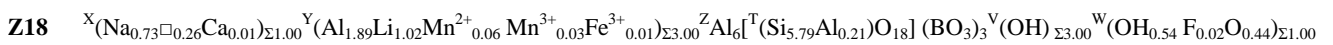

Supplement: Supplementary file 1 [file ejm-35-755-2023-supplement.zip]
