# Supplementary material for: Genetic model for the color anomalies at the termination of pegmatitic gem tourmaline crystals from the island of Elba, Italy
Source: Copernicus journal article supplement (doi:10.5194/ejm-35-755-2023), 2023-09-15
Supplement: Supplementary file 2 [file ejm-35-755-2023-supplement.zip]

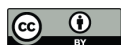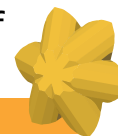

*Supplement of*

**Genetic model for the color anomalies at the termination of pegmatitic gem tourmaline crystals from the island of Elba, Italy**

**Alessandra Altieri et al.**

*Correspondence to:* Alessandra Altieri ([alessandra.altieri@uniroma1.it](mailto:alessandra.altieri@uniroma1.it))

- [ejm-35-755-2023-supplement-title-page.pdf](#)
- Supplementary data
  - [Table S1 EMPA data.xlsx](#)
  - [Table S2 chemical data.pdf](#)

The copyright of individual parts of the supplement might differ from the article licence.
